# 1 The invisibility cloak: Chitin binding 2 protein of *Verticillium nonalfalfae* 3 disguises fungus from plant chitinases

---

4 Helena Volk<sup>1</sup>, Kristina Marton<sup>1</sup>, Marko Flajšman<sup>1</sup>, Sebastjan Radišek<sup>2</sup>, Ingo Hein<sup>3,4</sup>, Črtomir Podlipnik<sup>5</sup>,  
5 Branka Javornik<sup>1</sup>, Sabina Berne<sup>1</sup>

6 <sup>1</sup>Department of Agronomy, Biotechnical Faculty, University of Ljubljana, Jamnikarjeva 101, SI-1000  
7 Ljubljana, Slovenia; <sup>2</sup>Slovenian Institute of Hop Research and Brewing, Cesta Žalskega tabora 2, SI-3310  
8 Žalec, Slovenia; <sup>3</sup>The James Hutton Institute, Invergowrie, Dundee DD2 5DA, Scotland, United Kingdom;  
9 <sup>4</sup>The University of Dundee, School of Life Sciences, Division of Plant Sciences at the JHI, Invergowrie,  
10 Dundee DD2 5DA, Scotland, United Kingdom; <sup>5</sup>Department of Chemistry and Biochemistry, Faculty of  
11 Chemistry and Chemical Technology, University of Ljubljana, Večna pot 113, SI-1000 Ljubljana, Slovenia

12  
13  
14 Corresponding author: S. Berne; E-mail: [sabina.berne@bf.uni-lj.si](mailto:sabina.berne@bf.uni-lj.si)

15  
16 Nucleotide sequence data is available under accession numbers MH325205 for *VnaChtBP*, and  
17 MH325206 for *VaChtBP*.

## 18 **Abstract**

19 During fungal infections, plant cells secrete chitinases that digest chitin in the fungal cell walls. The  
20 recognition of released chitin oligomers via lysin motif (LysM)-containing immune receptors results in the  
21 activation of defence signalling pathways. We report here that *Verticillium nonalfalfae*, a hemibiotrophic  
22 xylem-invading fungus, prevents this recognition process by secreting a CBM18 (carbohydrate binding  
23 motif 18)-chitin binding protein, VnaChtBP, which is transcriptionally activated specifically during the  
24 parasitic life stages. VnaChtBP is encoded by the *Vna8.213* gene which is highly conserved within the  
25 species, suggesting high evolutionary stability and importance for the fungal lifestyle. In a pathogenicity  
26 assay, however, *Vna8.213* knockout mutants exhibit wilting symptoms similar to the wild type fungus,  
27 suggesting that *Vna8.213* activity is functionally redundant during fungal infection of hop. In binding  
28 assay, recombinant VnaChtBP binds chitin and chitin oligomers *in vitro* with submicromolar affinity and  
29 protects fungal hyphae from degradation by plant chitinases. Using a yeast-two-hybrid assay, homology  
30 modelling and molecular docking, we demonstrated that VnaChtBP forms dimers in the absence of  
31 ligands and that this interaction is stabilized by the binding of chitin hexamers with a similar preference  
32 in the two binding sites. Our data suggest that, in addition to chitin binding LysM (CBM50) and Avr4  
33 (CBM14) fungal effectors, structurally unrelated CBM18 effectors have convergently evolved to prevent  
34 hydrolysis of the fungal cell wall against plant chitinases.

## 35 **Introductory statements**

36 Plant defense against pathogenic organisms relies on innate immunity, which is triggered by recognition  
37 of pathogen-derived or endogenous danger signals by plant receptors, described as pattern-triggered  
38 immunity (PTI) and effector-triggered immunity (ETI) (Jones and Dangl 2006; Dodds and Rathjen 2010).  
39 PTI, as a first line of defense, is activated by host cell surface-localized pattern recognition receptors  
40 (PRRs) sensing pathogen- and danger-associated molecular patterns (PAMPs and DAMPs, respectively)  
41 (Boller and Felix 2009; Böhm et al. 2014), which can be suppressed by pathogen virulence effectors (Dou  
42 and Zhou 2012). Host recognition of pathogen effectors by cytoplasmic nucleotide-binding domain  
43 leucine-rich repeat receptors (NLRs) leads to a second line of defense, ETI (Jones and Dangl 2006; Spoel  
44 and Dong 2012).

45 Pattern recognition receptors, which are either receptor-like kinases (RLKs) or receptor-like proteins  
46 (RLPs) that function in conjunction with RLKs, sense PAMPs or DAMPs and transduce downstream  
47 signaling to trigger PTI responses. Early PTI responses include the rapid generation of reactive oxygen  
48 species, activation of ion channels and mitogen-activated protein kinases. In turn, this leads to the  
49 expression of defense related genes, leading to an accumulation of antimicrobial compounds such as  
50 enzymes, which damage pathogen structures, inhibitors of pathogen enzymes and other antimicrobial  
51 molecules (Boller and Felix 2009; Dodds and Rathjen 2010; Macho and Zipfel 2014).

52 PAMPs, released during infection, are conserved molecular patterns characteristic of different pathogen  
53 classes (Ranf 2017). In fungi, chitin, in addition to beta-glucan and xylanase, is a well-studied PAMP that  
54 activates the host defense response. Chitin (a polymer of  $\beta$ -1,4-linked N-acetylglucosamine; (GlcNAc)<sub>n</sub>), is  
55 a major and highly conserved component of fungal cell walls and can be degraded to chitin  
56 oligosaccharides by plant apoplastic chitinases. The generated chitin fragments are recognized by a chitin  
57 perception system and subsequently activate PTI (Shibuya and Minami 2001; Sanchez-Vallet et al. 2014;  
58 Shinya et al. 2015).

59 Major chitin sensing PRRs, RLKs and RLPs belonging to the LysM domain family, are well studied in  
60 *Arabidopsis* and rice (Gust et al. 2012; Ranf 2017). *Arabidopsis* LysM-RLK AtCERK1 (chitin elicitor receptor  
61 kinase1) binds N-acetylated chitin fragments with three LysM motifs and, through homodimer  
62 formation, mediates chitin-inducible plant defenses (Miya et al. 2007; Liu et al. 2012). Cao et al. (2014)  
63 later identified another LysM-RLK in *Arabidopsis*, AtLYK5, which binds chitin at higher affinity than  
64 AtCERK1. The authors propose that AtLYK5 functions as the major chitin receptor, which recruits  
65 AtCERK1 to form a chitin inducible receptor complex. In rice, two receptors are involved in chitin  
66 triggered immunity. LysM-RLP OsCEBiP (chitin elicitor binding protein) binds N-acetylated chitin  
67 fragments, which initiates receptor homodimerization and further heterodimerization with OsCERK1.  
68 This heterotetramer formation triggers chitin induced PTI (Hayafune et al. 2014).

69 To overcome chitin-triggered immunity, successful pathogens have evolved various strategies, including  
70 alteration of the composition and structure of cell walls, modification of carbohydrate chains and  
71 secretion of effector proteins to prevent hydrolysis of the fungal cell wall or the release and recognition  
72 of chitin oligosaccharides (Sanchez-Vallet et al. 2014).

73 A well-described strategy of fungal cell wall protection against host chitinases is that of the tomato leaf  
74 mold fungus *Cladosporium fulvum*, which secretes chitin-binding protein Avr4 during infection. Avr4  
75 effector binds with its carbohydrate-binding module family 14 (CBM14) to the fungal cell wall chitin and  
76 thus shields fungal hyphae against degradation by chitinases (van den Burg et al. 2006; van Esse et al.  
77 2007). There is evidence for a similar protection of cell wall chitin in a phylogenetically closely related  
78 species of the Dothideomycete fungi class harboring homologs of Avr4 (Stergiopoulos et al. 2010).  
79 Protection of fungal hyphae against hydrolysis by chitinases has also been shown for Mg1LysM and  
80 Mg3LysM of *Zymoseptoria tritici* (formerly *M. graminicola*) (Marshall et al. 2011). Furthermore, Vd2LysM  
81 from *Verticillium dahliae* (Kombrink et al. 2017) belongs to LysM fungal effectors which are known to  
82 bind chitin oligomers. The first LysM effector, Ecp6, was found in the tomato pathogen *C. fulvum* and its  
83 characterization provided evidence that Ecp6 specifically and with high affinity binds chitin  
84 oligosaccharides. This competition with receptors subsequently disrupts chitin recognition by host  
85 receptors and suppresses the chitin-triggered immune response (Bolton et al. 2008; de Jonge et al. 2010;  
86 Sánchez-Vallet et al. 2013). Genomes contain several genes for LysM effectors and those highly  
87 expressed during infection have been characterized in fungal pathogens, including *Z. tritici* (Marshall et  
88 al. 2011), *Magnaporthe oryzae* (Mentlak et al. 2012), *Colletotrichum higginsianum* (Takahara et al. 2016)  
89 and *V. dahliae* (Kombrink et al. 2017). These studies demonstrate the involvement of LysM effectors in  
90 pathogen virulence by scavenging chitin oligomers to prevent recognition by the host chitin receptors,  
91 thus suppressing the chitin-triggered immunity.

92 The question arises if there are other molecules/systems/complexes apart from Avr4 (CBM14) and LysM  
93 (CBM50) effectors that can interfere with plant chitin perception and activation of PTI. We have been  
94 studying the *Verticillium nonalfalfae* – hop (*Humulus lupulus* L.) pathosystem. In an early comparative  
95 transcriptomic study of compatible and incompatible interactions (Cregeen et al. 2015), an *in planta*  
96 expressed *V. nonalfalfae* lectin gene was detected. A preliminary study showed that this *V. nonalfalfae*  
97 lectin contains putative carbohydrate-binding module family 18, CBM18 (Wright et al. 1991) domains.  
98 CBM18 is a chitin-binding domain involved in recognition of chitin oligomers and typically found in fungal  
99 and plant proteins in one or more copies (Lerner and Raikhel 1992). We report here on the  
100 characterization of *V. nonalfalfae* lectin with six CBM18 domains and show that it is a novel effector in  
101 plant fungal pathogens. CBM18 binds chitin and protects hyphae of *Trichoderma viride* from hop  
102 chitinases in an *in vitro* protection assay.

103

## 104 Results

### 105 The majority of CBM18 module containing proteins of *V. nonalfalfae* are expressed in 106 *planta*

107 The *Vna8.213* gene, encoding a putative pathogen CBM18-containing chitin binding protein (*VnaChtBP*),  
108 has previously been identified as a differentially expressed transcript during compatible and  
109 incompatible interactions of *V. nonalfalfae* and hop (Cregeen et al. 2015). Surveying the *V. nonalfalfae*  
110 genome (Jakše et al. 2018) uncovered ten additional genes that encode for proteins with at least one  
111 CBM18 module (Fig. 1). These genes were grouped into four categories according to their domain  
112 architecture: Lectin-like proteins (Fig. 1 A), Chitinases (Fig. 1 B), Chitin deacetylases (Fig. 1 C) and  
113 Xyloglucan endotransglucosylase (Fig. 1 D). The size of these proteins ranged between 349 and 1,696  
114 amino acids (*Vna6.1* and *Vna1.668*, respectively) and they harbored between one to ten CBM18  
115 modules. Amongst these genes, ten are differentially expressed *in planta* (Fig. 1 E) (Marton et al. 2018)  
116 and five (*Vna2.980*, *Vna6.6*, *Vna8.213*, *Vna9.506* and *Vna9.510*) were predicted to be classically secreted  
117 proteins with N-terminal signal peptides. Amongst the chitinases (Fig. 1 B), transcripts of *Vna3.655* and  
118 *Vna9.506* were detected exclusively in susceptible hop, *Vna1.668* transcripts were found expressed in  
119 the roots of both resistant ('Wye Target') and susceptible ('Celeia') hop varieties, while transcripts of  
120 *Vna2.980* and *Vna9.510* were barely detectable. Interestingly, only one chitin deacetylase gene  
121 (*VnaUn.355*) was expressed during infection, and it showed preferential induction in the roots of both  
122 hop varieties. Such an expression profile was also evident for transcripts of *Vna6.6* belonging to  
123 xyloglucan endotransglucosylase. The highest expression was observed for *Vna8.213* transcripts, in  
124 particular at the late stages of infection of susceptible hop. Interestingly, *Vna1.667* gene-encoding lectin-  
125 like protein, containing 10 CBM18 modules, was barely expressed in the roots of susceptible hop during  
126 the early infection stages.

127 To confirm the expression patterns of *Vna8.213* measured by RNA-Seq, detailed gene expression  
128 profiling of root and shoot samples from susceptible and resistant hop varieties was performed using RT-  
129 qPCR at 6, 12 and 18 days post-inoculation (dpi) with *V. nonalfalfae* (Fig. 2). Gene expression of  
130 *Vna8.213*, from here on designated as *VnaChtBP*, increased with time, reaching the highest abundance in  
131 stems of susceptible hop at 18 dpi. The overall *VnaChtBP* expression in resistant hop was at a much  
132 lower level than in the susceptible variety and peaked at 12 dpi in stems. These results indicate that  
133 *VnaChtBP* expression is induced *in planta* and its transcript abundance in susceptible hop increases with  
134 progression of fungal colonization.

### 135 Sequence conservation suggests evolutionary stability of *VnaChtBP*

136 To investigate the presence and sequence variation of *VnaChtBP* in 28 *V. nonalfalfae* isolates (Suppl.  
137 Table S1), PCR amplification and Sanger sequencing of cloned genes was performed. The *VnaChtBP* gene  
138 was present in all analyzed isolates and displayed no sequence polymorphisms. This is consistent with  
139 purifying selection and suggests evolutionary stability of the gene as well as an important role in the  
140 fungal lifestyle.

141 Among all sequences deposited at NCBI, VnaChtBP shared the highest protein identity with a lectin from  
142 *V. alfae* (97%; an alfalfa isolate VaMs.102), followed by *V. dahliae* lectin-B (80%; a lettuce isolate  
143 VdLs.17), two *V. dahliae* hypothetical proteins, Vd0004\_g7043 and Vd0001\_g7025 (80% and 79%;  
144 strawberry isolates 12161 and 12158), and a hypothetical protein BN1708\_012400 from *V. longisporum*  
145 (78%; a rapeseed isolate VL1) (Suppl. Table S2). Additional homologs (Suppl. File S1), but with lower  
146 identity (48-39%), were identified in fungi amongst Sordariomyceta (40) and Dotideomyceta (3), and in  
147 fungi *Incertae sedis* amongst Neocallimastigomycetes (5) and Chytridiomycetes (2).

148 Due to the high sequence similarity shared between VnaChtBP and *V. alfae* VaMs.102 lectin, PCR  
149 screening and Sanger sequencing of amplicons from four additional *V. alfae* isolates was carried out.  
150 As with *VnaChtBP*, no allelic polymorphisms were found among the sequences obtained and comparison  
151 of *V. nonalfalae* and *V. alfae* gene sequences from these isolates also showed 97% sequence identity.  
152 Within the 36 single nucleotide polymorphisms identified, only resulted in 13 amino acid substitutions  
153 (Suppl. File S2).

## 154 *VnaChtBP* forms dimers and has two potential binding sites for interaction with 155 chitin

156 *V. nonalfalae VnaChtBP* is an intronless gene and predicted to encode for a cysteine rich (12.5%)  
157 apoplastic effector (VnaChtBP) with 400 amino acids, including N-terminal signal peptide and six type 1  
158 Chitin binding domains (ChtBD1; PF00187). This domain is classified in the CAZY database (Lombard et al.  
159 2014) as Carbohydrate-binding module 18 (CBM18) and consists of 30 to 43 residues rich in glycines and  
160 cysteines, which are organized in a conserved four-disulfide core (Wright et al. 1991; Andersen et al.  
161 1993; Asensio et al. 2000). It is a common structural motif, with a consensus sequence  
162 X3CGX7CX4CCSX2GXCGX5CX3CX3CX2 (Prosite PS50941), found in various plant and fungal defense  
163 proteins and is involved in the recognition and/or binding of chitin subunits (Finn et al. 2014).

164 Since many chitin binding proteins have been reported to form dimers (Liu et al. 2012; Sánchez-Vallet et  
165 al. 2013; Cao et al. 2014), a yeast-two-hybrid assay was carried out using *VnaChtBP* both as bait and prey  
166 to study the ability to dimerize. Dimer formation of VnaChtBP was detected on a minimal media using  
167 histidine as a reporter (Fig. 3 A). Consistent with a weak interaction, only limited growth was observed  
168 on triple dropout reporter media (synthetic complete medium without leucine, tryptophan and uracil)  
169 and the X-gal reporter was not activated.

170 To understand the chitin binding mechanism of CBM18 effectors better, homology modelling of  
171 VnaChtBP 3D structure was performed. The SWISS-MODEL server produced three models based on  
172 different templates, shown in Table 1. Model02 provided the best fit for four out of six CBM18 modules  
173 and was used as the basis of the characterization. Molecular docking of the chitin hexamer into the  
174 VnaChtBP model (Fig. 3 B) shows that each protein monomer contributes to the formation of two  
175 binding sites accessible to the ligand. In binding site I (BSI), chitin hexamer is accommodated in a shallow  
176 groove formed by four hevein domains of polypeptide chain A and two hevein domains of chain B, while  
177 binding site II (BSII) is comprised of four hevein domains of chain B and two domains of chain A.  
178 According to the analysis of the presented complex with YASARA, the binding of chitin hexamer in the  
179 BSI is strengthened by eleven (four accepted and seven donated) hydrogen bonds and eight hydrophobic

180 interactions, which contribute to the total binding energy of 6.891 kcal/mol (AutoDock/Vina) and an  
181 estimated dissociation constant of 8.88  $\mu$ M. Similar preference for binding of chitin hexamer in the BSII  
182 was observed, with an estimated dissociation constant of 2.01  $\mu$ M and the total binding energy of 7.772  
183 kcal/mol, supported by eight (three accepted, five donated) hydrogen bonds and 12 hydrophobic  
184 interactions between the ligand and receptor.

### 185 *VnaChtBP binds chitin in vitro and protects fungal hyphae against plant chitinases*

186 To confirm carbohydrate binding, *E. coli* produced and Ni-NTA affinity purified recombinant VnaChtBP  
187 (Suppl. Fig. S1) was used in a sedimentation assay with various carbohydrates. VnaChtBP binds  
188 specifically to chitin polymer, in the form of chitin beads and crab shell chitin, but not to the plant cell  
189 wall polymers cellulose and xylan (Fig. 4). To examine the affinity of VnaChtBP binding to chitin in more  
190 detail, recombinant protein was immobilized to the CM5 sensor chip and the VnaChtBP interaction with  
191 chitin hexamer was analyzed using surface plasmon resonance (SPR) (Kastritis and Bonvin 2013).  
192 VnaChtBP reveals concentration-dependent binding of chitin hexamer (Fig. 5) with a dissociation  
193 constant of  $0.78 \pm 0.58$   $\mu$ M, while no specific binding to other tested carbohydrates was detected (Suppl.  
194 Fig. S2). Since the chitin binding affinity of the protein increases for longer chitin oligomers (Asensio et al.  
195 2000), this value is comparable to other reported chitin oligomer binding affinities of fungal effectors but  
196 exceeds by one order of magnitude those reported for *Arabidopsis* chitin recognition receptors and  
197 hevein (Table 2).

198 Chitin binding effectors have been reported to protect fungal hyphae from plant chitinases (van den Burg  
199 et al. 2004; Marshall et al. 2011). To determine whether recombinant VnaChtBP can protect fungal cell  
200 walls against hydrolysis by plant chitinases, a cell protection assay adapted from Mentlak et al. (2012)  
201 was performed using germinating conidia of *Triходerma viride* and extracted xylem sap from *V.*  
202 *nonalfalfae* infected hop (Flajšman et al. 2017a) as a source of plant chitinases (containing 19 U of  
203 chitinase/mg total protein). In the presence of xylem sap, only minimal germination of the *T. viride*  
204 conidia occurred after 24 h incubation, while a pre-incubation in a 3  $\mu$ M solution of recombinant  
205 VnaChtBP prior to the addition of xylem sap, enabled germination of conidia and hyphal growth.  
206 Interestingly, aggregation and compaction of fungal hyphae was detected only in the presence of both  
207 xylem sap and VnaChtBP, while normal mycelial growth without hyphal aggregation was observed in the  
208 solution of VnaChtBP (Fig. 6). We assume that VnaChtBP by binding and probably surrounding chitin  
209 fibers in the fungal cell wall, masks chitin and protects it from degradation by xylem sap chitinases.

### 210 *VnaChtBP deletion has no significant effect on the growth and pathogenicity of V.* 211 *nonalfalfae*

212 Since *VnaChtBP* is specifically expressed during colonization of hop, its contribution to fungal virulence  
213 was tested in the susceptible hop variety 'Celeia'. *V. nonalfalfae* knockout mutants of *VnaChtBP* were  
214 generated by targeted gene disruption via *A. tumefaciens*-mediated transformation. Prior to plant  
215 inoculation, growth of fungal colonies and sporulation of knockout mutants were assessed *in vitro* and  
216 compared to wild type. In the selected knockout mutants, mycelial growth and fungal morphology did  
217 not differ significantly from the wild type. Reduced sporulation was observed for both mutants  
218 compared to the wild type but this did not impact on disease frequency (Suppl. Fig. S3). After inoculation

219 of hop plants, disease symptoms were independently assessed five times using a disease severity index  
220 (DSI) with a 0-5 scale (Radišek et al. 2003). After the final symptom assessment, the presence of fungus  
221 in all inoculated plants was confirmed through re-isolation tests and qPCR with fungus specific markers  
222 (Cregeen et al. 2015). Figure 7 shows symptom development in susceptible hop following infection with  
223 the wild type *V. nonalfalfae* and knockout mutants of *VnaChtBP*. Both *VnaChtBP* deletion mutants  
224 displayed Verticillium wilting symptoms (chlorosis and necrosis of the leaves) in susceptible hop similar  
225 to the wild type fungus, with no significant differences among them according to the DSI assessment.  
226 Independent pathogenicity assays with additional *VnaChtBP* deletion mutants yielded the same results  
227 (data not shown). This suggests that *VnaChtBP* function is redundant for *V. nonalfalfae* infection.

## 228 Discussion

229 *V. nonalfalfae*, a soil born fungal pathogen, causes serious economic damage in European hop growing  
230 regions. Significant efforts have been invested to study the molecular mechanisms of Verticillium wilt in  
231 hop and fungus pathogenicity (Radišek et al. 2006; Jakše et al. 2013; Cregeen et al. 2015; Mandelc and  
232 Javornik 2015; Flajšman et al. 2016; Jakše et al. 2018; Marton et al. 2018).

233 *In planta* expressed fungal proteins are potential effector candidates, which might be implicated in  
234 pathogen virulence. The here studied effector candidate *V. nonalfalfae VnaChtBP*, encodes for a CBM18  
235 domain containing chitin binding protein and is highly expressed in hop plants. Using an established  
236 bioinformatic pipeline (Marton et al. 2018), we identified eleven genes in the *V. nonalfalfae* genome that  
237 contain CBM18 domains. Of these genes, two harboured a single CBM18 domain (Fig. 1) and five,  
238 including *VnaChtBP*, contain a predicted N-terminal signal peptide. Although CBMs play a key role in the  
239 recognition of carbohydrates and are known to promote efficient substrate hydrolysis as a part of  
240 carbohydrate-active enzymes (e.g., CBM18 motifs found in chitinases), they have also been found to be  
241 present in toxins, virulence factors or pathogenesis-associated proteins (Guillén et al. 2010). Proteins  
242 containing CBM18 motifs are common in fungi, particularly in plant and animal pathogens. Indeed, they  
243 are almost three times as common in the proteomes of pathogens than in those of non-pathogenic fungi  
244 across the phylum Ascomycota (Soanes et al. 2008). Intriguingly, in *Verticillium* spp., CBM18 containing  
245 genes are more frequently observed in saprophytic *V. tricorpus* (13) (Seidl et al. 2015) than in pathogenic  
246 *V. dahliae* and *V. alfalfae* (9). The expansion of CBM18 domains in ChtBPs, could be linked to the  
247 evolution of pathogenicity, and has, for example, been reported in the fungal pathogen *B. dendrobatidis*,  
248 which has caused a worldwide decline of the amphibian populations (Abramyan and Stajich 2012). In  
249 total, eighteen genes with between one to eleven CBM18 domains have been identified in *B.*  
250 *dendrobatidis* including some classified as lectin-like proteins. Biochemical characterization of three such  
251 lectin-like proteins revealed that two have a signal peptide and co-localize with chitinous cell wall in  
252 *Saccharomyces cerevisiae*. Furthermore, one of these proteins has been shown to bind chitin and  
253 thereby protect *Trichoderma reesei* from exogenous chitinase, suggesting a role of lectin-like proteins in  
254 fungal defence (Liu and Stajich 2015). Similarly, in the rice blast fungus *M. oryzae*, 15 genes with one to  
255 four CBM18 domains were found, although gene-targeted disruption and tolerance to chitinase  
256 treatment did not support the implication of the tested genes in fungal pathogenicity (Mochizuki et al.  
257 2011).

258 VnaChtBP consists of six tandemly repeated CBM18 motifs, contains a signal peptide and is predicted to  
259 reside in the apoplasm, which is consistent with the role of chitin binding in the extracellular space.  
260 Homology search of proteins that contain CBM18 motifs in other *Verticillium* species, revealed that this  
261 type of protein is common in pathogenic *Verticillium* species but it seems not to be ubiquitous. For  
262 example, in the recently sequenced genomes of five *V. dahliae* strains isolated from strawberry, three  
263 strains harbored ChtBPs with five, six and ten CBM18 motifs, while none were detected in two other  
264 strains.

265 Monitoring the *in planta* expression of *VnaChtBP* showed that it is highly expressed at the later stages of  
266 infection in a susceptible hop cultivar, and continuous to be expressed even at 30 dpi, when plants  
267 exhibit severe wilting symptoms (Cregeen et al. 2015; Marton et al. 2018). In contrast, in a resistant  
268 cultivar, the *VnaChtBP* gene is slightly induced after infection and then completely down-regulated. The  
269 expression pattern of the *VnaChtBP* gene coincides with *V. nonalfalfae* colonization of hop, whereby the  
270 fungus spread is unimpeded in susceptible plants while colonization is arrested around 12-20 dpi in  
271 resistant hop plants, presumably due to strong plant resistance responses (Cregeen et al. 2015). The  
272 immune reaction in incompatible interaction is unlikely to impose selection pressure on the *VnaChtBP*  
273 gene since no allelic polymorphisms were detected among analysed *V. nonalfalfae* isolates. Similarly, no  
274 allelic variation was found in the closest (97% identity) homolog to the *VnaChtBP* gene from isolates of *V.*  
275 *alfalfae*, suggesting highly conserved genes. Allelic variation is commonly detected in fungal proteins that  
276 function as avirulent (Avr) determinants upon perception by the host defence, but not necessarily in  
277 virulence factors of the pathogen (Stergiopoulos et al. 2007). Taken together, we speculate that the  
278 absence of allelic variation and the high gene expression observed *in planta* suggest a role for VnaChtBP  
279 in virulence of *V. nonalfalfae*. However, in pathogenicity assay, *VnaChtBP* targeted deletion mutants  
280 were not significantly impaired in their hops infectivity compared to wild type fungus which is in line with  
281 functional redundancy. Unchanged virulence of deletion mutants, presumably due to functional  
282 redundancy, has been reported for two other tested CBM18-containing ChtBPs in *M. oryzae* (Mochizuki  
283 et al. 2011) and also for LysM fungal effector, Mg1LysM of *Mycosphaerella graminicola* (Marshall et al.  
284 2011). Indeed, other putative ChtBPs have been found in the *V. nonalfalfae* genome, which may have a  
285 role in protection of the fungal cell wall chitin or may interfere with chitin-triggered plant immunity.  
286 Specifically, Vna9.508, with one LysM domain, and Vna8.102, with five LysM domains, are both  
287 expressed during infection of hop and predicted to be secreted proteins with apoplastic localization  
288 (Marton et al. 2018). Orthologues of *C. fulvum* Avr4 with CBM14 chitin-binding motif were not identified  
289 in the *V. nonalfalfae* genome (Jakše et al. 2018) or in the predicted proteomes of other *Verticillium*  
290 species (Seidl et al. 2015).

291 Consistent with previously characterized CBM18 containing proteins from *M. oryzae* (Mochizuki et al.  
292 2011) and *B. dendrobatidis* (Liu and Stajich 2015), recombinant VnaChtBP binds specifically to chitin  
293 beads and crab shell chitin, but not to plant cell wall cellulose or xylan. In addition to chitin polymer,  
294 recombinant VnaChtBP also binds chitin hexamer in an SPR experiment, with binding affinity in the  
295 submicromolar range. Compared to plant chitin receptors, recombinant VnaChtBP alongside LysM  
296 effectors Ecp6 from *C. fulvum*, Slp1 from *M. oryzae* (Mentlak et al. 2012), ChELP1 and ChELP2 from *C.*  
297 *higginsianum* (Takahara et al. 2016) exhibit three to five orders of magnitude higher affinity to chitin



298 oligomers. It is thus not surprising that these fungal effectors are able to outcompete plant chitin  
299 receptors, such as *Arabidopsis thaliana* AtLYK5 (Cao et al. 2014) and AtCERK1 (Liu et al. 2012).

300 Based on NMR studies and solved crystal structures of plant LysM chitin receptors, several mechanisms  
301 for binding of chitin have been proposed; from a simple ‘continuous groove’ model for AtCERK1 (Liu et  
302 al. 2012) to the OsCEBiP ‘sandwich’ (Hayafune et al. 2014) and ‘sliding mode’ model (Liu et al. 2016).  
303 However, these models have been unable to explain the observed elicitor activities of chitin oligomers.  
304 Building on these models and using a range of chitosan polymers and oligomers bound to *Atcerk1*  
305 mutants resulted in an improved ‘slipped sandwich’ model that fits all experimental results (Gubaeva et  
306 al. 2018). A recent structural study of fungal LysM effector Ecp6 from *C. fulvum* revealed a novel chitin  
307 binding mechanism that explained how LysM effectors can outcompete plant host receptors for chitin  
308 binding (Sánchez-Vallet et al. 2013). Ecp6 consists of three tightly packed LysM domains, with a  
309 typical  $\beta\alpha\beta$  fold. Intra-chain dimerization of chitin-binding regions of LysM1 and LysM3 leads to the  
310 formation of a deeply buried chitin binding groove with an ultra-high (pM) affinity. The remaining LysM2  
311 domain also binds chitin, albeit with low micromolar affinity, and interferes with chitin-triggered  
312 immunity, possibly by preventing chitin immune receptor dimerization and not by chitin fragment  
313 sequestering, as in case of LysM1-LysM3.

314 To date, to the best of our knowledge, the molecular mechanism of chitin binding of CBM18 fungal  
315 effectors remains elusive. However, the 3D homology model of VnaChtBP provides a tangible model for  
316 the molecular docking of the chitin hexamer. Although only four out of six CBM18 domains could be  
317 reliably modelled, the analysis revealed that VnaChtBP dimerizes. Importantly, this prediction was  
318 independently validated through a yeast-two-hybrid experiment. The VnaChtBP complex has two  
319 putative chitin binding sites which form a shallow binding cleft by cooperation of both polypeptide  
320 chains and have a similar preference to chitin. As in CBM18 lectin-like plant defence proteins (Jiménez-  
321 Barbero et al. 2006), typically represented by a small antifungal protein hevein from the rubber tree  
322 (*Hevea brasiliensis*), a network of hydrogen bonds and several hydrophobic interactions occur between  
323 VnaChtBP residues and N-acetyl moieties of the chitin oligomer. These are thought to stabilize the  
324 interaction and contribute to submicromolar chitin binding affinity, as determined by SPR. Similarly, the  
325 recently solved crystal structure of fungal effector CfAvr4, a CBM14 lectin, in complex with chitin  
326 hexamer (Hurlburt et al. 2018) has revealed that two effector molecules form a sandwich structure,  
327 which encloses two parallel stacked chitin hexamer molecules, shifted by one sugar ring, in an extended  
328 chitin binding site. In this complex, the interaction is mediated through aromatic residues and numerous  
329 hydrogen bonds with both side chains and main chains. Interestingly, no intermolecular protein-protein  
330 interactions have been observed across the dimer, suggesting ligand induced effector dimerization. Site-  
331 directed mutagenesis of residues responsible for binding of chitin hexamer showed that ligand binding  
332 function is independent from recognition by host resistance protein Cf-4.

333 Fungal plant pathogens have evolved several strategies to escape the surveillance of chitin-related  
334 immune systems (Sanchez-Vallet et al. 2014). The different mechanisms used include conversion of  
335 chitin to chitosan by chitin deacetylases and inclusion of  $\alpha$ -1,3-glucan in the cell walls, as well as  
336 secretion of diverse effectors that can shield the fungal hyphae from hydrolysis by plant chitinases,  
337 directly inhibiting their activity, acting as scavengers of chitin fragments or preventing chitin-induced

338 receptor dimerization. Secreted effector Avr4 from *C. fulvum* binds to fungal cell wall chitin to reduce its  
339 accessibility to host chitinases (van den Burg et al. 2006). Similar to CfAvr4, wheat pathogen *M.*  
340 *graminicola* secreted effectors Mg1LysM and Mg3LysM protect fungal hyphae from hydrolysis by plant  
341 chitinases (Marshall et al. 2011). We provide evidence that, in addition to Avr4 (CBM14) and LysM  
342 (CBM50) effectors, structurally unrelated CBM18 lectin-like proteins that are found in fungal pathogens  
343 of plants (this study) and amphibian pathogens (Liu and Stajich 2015) have evolved a chitin shielding  
344 ability against plant chitinases.  
345

## 346 **Materials and Methods**

### 347 **Maintenance of plant cultures and cultivation of microorganisms**

348 *Nicotiana benthamiana* seedlings were grown at  $23 \pm 2^\circ\text{C}$  under a 16:8 photoperiod. Hop (*Humulus*  
349 *lupulus* L.) of susceptible 'Celeia' and resistant 'Wye Target' cultivars were grown as described previously  
350 (Flajšman et al. 2017b). *Escherichia coli* MAX Efficiency DH5 $\alpha$  or MAX Efficiency DH10B (both from  
351 Invitrogen, ThermoFisher Scientific) were used for plasmid propagation and were grown at  $37^\circ\text{C}$  on LB  
352 agar plates or liquid medium supplemented with appropriate antibiotics (carbenicillin 100 mg/liter,  
353 kanamycin 50 mg/liter, spectinomycin 100 mg/liter or gentamicin 25 mg/liter). *E. coli* Shuffle T7 (New  
354 England Biolabs) were propagated at  $30^\circ\text{C}$  and protein expression was performed at  $16^\circ\text{C}$ . *Trichoderma*  
355 *viride* was obtained from The Microbial Culture Collection Ex (IC Mycosmo (MRIC UL)) and all *Verticillium*  
356 strains were from the Slovenian Institute of Hop Research and Brewing fungal collection. Fungi were  
357 grown at  $24^\circ\text{C}$  in the dark on  $\frac{1}{2}$  Czapek-Dox agar plates or liquid medium. Knockout mutants were  
358 retrieved from selection medium supplemented with 150 mg/liter timentin and 75 mg/liter hygromycin.  
359 For agroinfiltration, *Agrobacterium tumefaciens* MV3101 was grown at  $28^\circ\text{C}$  on YEB agar plates or liquid  
360 medium supplemented with rifampicin 25 mg/liter, gentamicin 25 mg/liter, and spectinomycin 50  
361 mg/liter.

### 362 **RNA sequencing**

363 RNA-Seq library preparation from *V. nonalfalfae* infected hop at 6, 12, 18 and 30 days post inoculation  
364 (dpi) and data processing have been previously described (Progar et al. 2017). Fungal transcripts were  
365 filtered out and their gene expression profiles were generated using the Hierarchical clustering with  
366 Euclidean distance method in R language (R Core Team 2016). Data were presented as a matrix of  
367  $\log_2\text{CPM}$  (counts per million–number of reads mapped to a gene model per million reads mapped to the  
368 library) expression values.

### 369 ***VnaChtBP* gene expression profiling with RT-qPCR**

370 The expression of *VnaChtBP* was quantified by RT-qPCR in hop infected with *V. nonalfalfae* isolate T2.  
371 Total RNA was extracted at 6, 12, and 18 dpi using a Spectrum Plant total RNA kit (Sigma-Aldrich) and 1  
372  $\mu\text{g}$  was reverse transcribed to cDNA using a High Capacity cDNA reverse transcription kit (Applied  
373 Biosystems). The qPCR reaction was run in 5 biological and 2 technical replicates on an ABI PRISM 7500

374 (Applied Biosystems), under the following conditions: denaturation at 95°C for 10 min, followed by 40  
375 cycles at 95°C for 10 s, 60°C for 30 s, and consisted of: 50 ng of cDNA, 300 nM forward and reverse  
376 primer, and 5 µl of Fast SYBR Green master mix (Roche). The results were analyzed using the  $\Delta\Delta C_t$   
377 method (Schmittgen and Livak 2008). Transcription levels of *VnaChtBP* were quantified relative to its  
378 expression in liquid Czapek-Dox medium and normalized to fungal biomass in hop using topoisomerase  
379 and splicing factor as reference genes (Marton et al. 2018). Primers used are listed in Table 3.

### 380 Genetic analysis

381 Genomic DNA was extracted from 7-10 day PDA cultured *Verticillium* isolates by the CTAB extraction  
382 method (Möller et al. 1992). PCR reactions were performed in 50 µl using Q5® High-Fidelity DNA  
383 Polymerase (NEB), 500 nM gene-specific primers (Table 3) and 100 ng DNA under the following  
384 conditions: denaturation at 95°C for 10 min, followed by 40 cycles at 95°C for 10 s, 58°C for 30 s, 72°C for  
385 90 s, and a final elongation step at 72°C for 90 s. PCR products were purified from agarose gel (Silica  
386 Bead DNA Gel Extraction Kit, Fermentas), cloned into pGEM®-T Easy vector (Promega) and sequenced  
387 using Sanger technology with gene-specific and plasmid-specific primers (Table 3). Sequences were  
388 analyzed using CodonCode Aligner V7.1.2 (CodonCode Co.) and deposited at the NCBI.

### 389 Bioinformatic analysis

390 A putative localization of *VnaChtBP* to the apoplast was predicted with ApoplastP 1.0 (Sperschneider et  
391 al. 2017). To classify *V. nonalfalfae* CBM18-containing proteins functionally, sequence based searches  
392 were carried out using the FunFHMmer web server at the CATH-Gene3D database (Dawson et al. 2017).  
393 To obtain *VnaChtBP* homologs, the amino acid sequence of *VnaChtBP* was used as a query for NCBI  
394 BLAST+ against UniProt Knowledgebase at Interpro (Li et al. 2015).

### 395 Yeast-two-hybrid assay

396 Dimerization of *VnaChtBP* was examined with a yeast-two-hybrid experiment using the ProQuest Y2H  
397 system (Invitrogen). To generate bait and prey vectors, the *VnaChtBP* gene was cloned into pDEST22 and  
398 pDEST32, respectively, and co-transformed in yeast. The interactors were confirmed by plating the yeast  
399 co-transformants on triple dropout reporter medium SC-LWH (synthetic complete medium without  
400 leucine, tryptophan and histidine), on triple dropout reporter medium SC-LWU (synthetic complete  
401 medium without leucine, tryptophan and uracil) and by performing an X-gal assay. The self-activation  
402 test of a pDEST22 construct containing *VnaChtBP* gene with empty pDEST32 vectors was also performed.

### 403 3D modelling and molecular docking

404 The SWISS-MODEL (Arnold et al. 2006; Waterhouse et al. 2018) server produced three models based on  
405 different templates and Model02 was selected for further modelling. The output protein structure was  
406 additionally minimized in explicit water using an AMBER14 force field (Duan et al. 2003) and  
407 'em\_runclean.mcr' script within YASARA Structure (Krieger and Vriend 2014, 2015). A 3D structure  
408 model of chitin hexamer was built with SWEET PROGRAM v.2 (Bohne et al. 1998, 1999), saved as a PDB  
409 file and used as a ligand in subsequent molecular docking experiments with AUTODOCK/VINA (Trott and  
410 Olson 2009), which is incorporated in YASARA Structure. To ensure the integrity of docking results, 200  
411 independent dockings of the ligand to the receptor were performed. The pose with the best docking

412 score was selected for further refinement using 'md\_refine.mcr' script provided by YASARA Structure.  
413 The final model of the hexameric chitin bound to the VnaChtBP dimer was then used for the analysis.

#### 414 Recombinant protein production

415 *VnaChtBP* DNA without predicted signal peptide (SignalP 4.1) was cloned into a pET32a expression vector  
416 using a Gibson Assembly® Cloning Kit (NEB). The protein expression in *E. coli* SHuffle® T7 cells (NEB) was  
417 induced at OD<sub>600</sub> = 0.6 with 1 mM IPTG and incubated overnight at 16°C. The recombinant protein was  
418 solubilized from inclusion bodies using a mild solubilization method (Qi et al. 2015). Briefly, pelleted cells  
419 were resuspended in cold PBS buffer and disrupted by sonication. After centrifugation, the pellet was  
420 washed with PBS, resuspended in urea, frozen at -20°C and slowly allowed to thaw at RT. The  
421 recombinant protein was purified using Ni-NTA Spin Columns (Qiagen) according to the manufacturer's  
422 protocol, aliquoted and stored in 20 mM Tris (pH 8.0) at -80°C.

#### 423 Carbohydrate sedimentation assay and Western blot detection

424 The carbohydrate sedimentation assay was adapted from (van den Burg et al. 2006). Briefly, 15 µg of  
425 recombinant VnaChtBP in 20 mM Tris (pH 8.0) was mixed with 1.5 mg of chitin magnetic beads (NEB),  
426 crab shell chitin (Sigma-Aldrich), cellulose (Sigma-Aldrich) or xylan (Apollo Scientific) and incubated at RT  
427 for 2 h on an orbital shaker at 350 rpm. The same amount of protein in Tris buffer without added  
428 carbohydrates was used as a negative control. After centrifugation (5 min, 13,000 g), the supernatant  
429 was collected and the pellet was washed three times with 800 µl 20 mM Tris (pH 8.0) prior to  
430 resuspension in 4X Bolt™ LDS Sample Buffer with the addition of reducing agent (Invitrogen).

431 The presence of VnaChtBP in different fractions was determined by WB analysis. Samples (25 µL) were  
432 loaded on a precast Bolt™ 4-12% Bis-Tris gel (Invitrogen) and SDS-PAGE in 1x MOPS running buffer was  
433 performed using a Mini Gel Tank (ThermoFisher Scientific) for 30 min at 200 V. Proteins were transferred  
434 for 1 h at 30 V to an Invitrolon PVDF membrane (Invitrogen) and Ponceau S stained. The membrane was  
435 blocked with 5% BSA in 1x PBS before the addition of the primary antibody His-probe (H-3) (SCBT)  
436 (1:1,000). The membrane was incubated overnight at 4°C, washed with 1x PBS and incubated in a  
437 solution of secondary Chicken anti-mouse IgG-HRP (SCBT) (1:5,000) for 1 h. Protein bands were detected  
438 using Super Signal West Pico (ThermoFisher Scientific) ECL substrate in a GelDoc-It2 Imager (UVP).

#### 439 Surface plasmon resonance

440 The binding of hexa-N-acetyl chitohexaose ((GlcNAc)<sub>6</sub>; IsoSep) to VnaChtBP was measured using a  
441 Biacore T100 analytical system and CM5 sensor chip (Biacore, GE Healthcare). The CM5 sensor chip was  
442 activated using an Amine coupling Kit (GE Healthcare) according to the manufacturer's instructions.  
443 VnaChtBP was diluted into 10 mM Sodium acetate pH 5.1 to a final concentration of 0.1 mg/ml and  
444 injected for five minutes over the second flow cell. The first flow cell was empty and served as a  
445 reference cell to control the level of non-specific binding. The final immobilization level was  
446 approximately 10,000 response units (RU). The (GlcNAc)<sub>6</sub> stock solution was diluted into a series of  
447 concentrations (0.05, 0.1, 0.2, 0.4, 0.8, 1.6, 3.2 and 6.4 µM) with the HBS buffer (10 mM HEPES, 140 mM  
448 NaCl, pH 7.4) and assayed to detect direct binding to VnaChtBP. Titration was performed in triplicate. In  
449 addition to chitin hexamer, N-acetyl glucosamine, glucosamine, glucose, galactose and mannose were  
450 tested at a 500 µM concentration in HBS buffer. Biacore T100 Evaluation software was used to assess the

451 results. First, the sensorgrams were reference and blank subtracted, then a Steady State Affinity model  
452 was applied to calculate the affinity constant ( $K_d$ ). The average of three repeated experiments was used  
453 for final  $K_d$  determination.

#### 454 Xylem sap extraction and chitinase activity assay

455 Xylem sap was extracted from infected hop plants in a pressure chamber at 0.2 MPa for 120 min  
456 (Flajšman et al. 2017a). Chitinase activity of xylem sap was determined by mixing 150  $\mu$ l of xylem sap, or  
457 100 mM Na-acetate (pH 5.0) buffer as negative control, with 1.5 mg of Chitin Azure (Sigma-Aldrich)  
458 dissolved in 150  $\mu$ l 100 mM Na-acetate (pH 5.0). The samples were incubated for 150 min at 25°C on a  
459 rotatory shaker at 70 rpm. An aliquot of 80  $\mu$ l was taken immediately (blank sample) and after 150 min.  
460 The reaction was stopped with the addition of 20%v/v HCl and samples were centrifuged for 10 min at  
461 10,000 g. The chitinase activity of xylem sap in the supernatant was determined by measuring the  
462 absorbance of released Remazol Brilliant Blue dye at 575 nm against 100 mM Na-acetate (pH 5.0). One  
463 enzyme unit was defined as the amount of chitinase that produced a 0.01 increase in absorbance at 575  
464 nm, measured at 25°C and pH 5.0. The total protein concentration of the xylem sap was measured in a  
465 10x diluted sample using a Pierce™ BCA Protein Assay Kit (Thermo Scientific) following the standard  
466 protocol.

#### 467 Cell Protection Assay

468 The cell protection assay was adapted from Mentlak et al., 2012. *Trihoderma viride* conidia were  
469 harvested, diluted to 2,000 conidia/ml in 50  $\mu$ l ½ Czapek-dox medium and incubated overnight. After  
470 germination of the conidia, 25  $\mu$ l of recombinant VnaChtBP (3  $\mu$ M final concentration) or an equal  
471 volume of storage buffer (20 mM Tris; pH 8.0) were added and the conidial suspensions were incubated  
472 for 2 h. Fungal cell wall hydrolysis was triggered by the addition of 25  $\mu$ l of xylem sap as a source of plant  
473 chitinases, while 25  $\mu$ l of Na-acetate (100 mM; pH 5.0) was used in the control experiment. After 24 h  
474 incubation, mycelia formation and fungal growth were examined using a Nikon Eclipse 600 microscope.

#### 475 Pathogenicity assay

476 *VnaChtBP* knockout mutants were generated using the *Agrobacterium tumefaciens* mediated  
477 transformation protocol described previously (Flajšman et al. 2016) and primers listed in Table 3. Before  
478 pathogenicity tests were carried out, fungal growth and conidiation were inspected as described  
479 previously (Flajšman et al. 2017b). Ten plants of the Verticillium wilt susceptible hop cultivar 'Celeia'  
480 were inoculated by 10-min root dipping in a conidia suspension ( $5 \times 10^6$  conidia/ml) of two arbitrarily  
481 selected *VnaChtBP* knockout mutants. Conidia of the wild type *V. nonalfalfae* isolate T2 served as a  
482 positive control and sterile distilled water was used as a mock control. Re-potted plants were grown  
483 under control conditions in a growth chamber (Flajšman et al. 2017b). Verticillium wilting symptoms  
484 were assessed five times over seven weeks post-inoculation using a disease severity index (DSI) with a 0-  
485 5 scale (Radišek et al. 2003). After symptom assessment, a fungal re-isolation test (Flajšman et al. 2017b)  
486 and qPCR using *V. nonalfalfae* specific primers (Cregeen et al. 2015) were performed to confirm infection  
487 of the tested hop plants.

## 488 **Acknowledgments**

489 This research was supported by the Slovenian Research Agency grants P4-0077, J4-8220 and fellowship  
490 342257. This work benefitted from interactions promoted by the COST Action FA 1208 [https://cost-](https://cost-sustain.org)  
491 [sustain.org](https://cost-sustain.org). The authors would like to thank Dr Vasja Progar for transcriptome analysis, Dr Vesna Hodnik  
492 for SPR analysis and Dr Miles Armstrong, Dr Marko Dolinar and Dr Jernej Jakše for technical advice.

## 493 **Literature Cited**

- 494 Abramyan, J., and Stajich, J. E. 2012. Species-specific chitin-binding module 18 expansion in the  
495 amphibian pathogen *Batrachochytrium dendrobatidis*. *MBio*. 3:e00150-12
- 496 Andersen, N. H., Cao, B., Rodríguez-Romero, A., and Arreguin, B. 1993. Hevein: NMR assignment and  
497 assessment of solution-state folding for the agglutinin-toxin motif. *Biochemistry*. 32:1407–22
- 498 Arnold, K., Bordoli, L., Kopp, J., and Schwede, T. 2006. The SWISS-MODEL workspace: a web-based  
499 environment for protein structure homology modelling. *Bioinformatics*. 22:195–201
- 500 Asensio, J. L., Cañada, F. J., Siebert, H.-C., Laynez, J., Poveda, A., Nieto, P. M., Soedjanaamadja, U.,  
501 Gabius, H.-J., and Jiménez-Barbero, J. 2000. Structural basis for chitin recognition by defense  
502 proteins: GlcNAc residues are bound in a multivalent fashion by extended binding sites in hevein  
503 domains. *Chem. Biol.* 7:529–543
- 504 Böhm, H., Albert, I., Fan, L., Reinhard, A., and Nürnberger, T. 2014. Immune receptor complexes at the  
505 plant cell surface. *Curr. Opin. Plant Biol.* 20:47–54
- 506 Bohne, A., Lang, E., and von der Lieth, C.-W. 1998. W3-SWEET: Carbohydrate Modeling By Internet. *J.*  
507 *Mol. Model.* 4:33–43
- 508 Bohne, A., Lang, E., and von der Lieth, C. W. 1999. SWEET - WWW-based rapid 3D construction of oligo-  
509 and polysaccharides. *Bioinformatics*. 15:767–8
- 510 Boller, T., and Felix, G. 2009. A renaissance of elicitors: perception of microbe-associated molecular  
511 patterns and danger signals by pattern-recognition receptors. *Annu. Rev. Plant Biol.* 60:379–406
- 512 Bolton, M. D., van Esse, H. P., Vossen, J. H., de Jonge, R., Stergiopoulos, I., Stulemeijer, I. J. E., van den  
513 Berg, G. C. M., Borrás-Hidalgo, O., Dekker, H. L., de Koster, C. G., de Wit, P. J. G. M., Joosten, M. H.  
514 A. J., and Thomma, B. P. H. J. 2008. The novel *Cladosporium fulvum* lysin motif effector Ecp6 is a  
515 virulence factor with orthologues in other fungal species. *Mol. Microbiol.* 69:119–36
- 516 van den Burg, H. A., Harrison, S. J., Joosten, M. H. A. J., Vervoort, J., and de Wit, P. J. G. M. 2006.  
517 *Cladosporium fulvum* Avr4 protects fungal cell walls against hydrolysis by plant chitinases  
518 accumulating during infection. *Mol. Plant. Microbe. Interact.* 19:1420–30
- 519 van den Burg, H. A., Spronk, C. A. E. M., Boeren, S., Kennedy, M. A., Vissers, J. P. C., Vuister, G. W., de  
520 Wit, P. J. G. M., and Vervoort, J. 2004. Binding of the AVR4 elicitor of *Cladosporium fulvum* to  
521 chitotriose units is facilitated by positive allosteric protein-protein interactions: the chitin-binding  
522 site of AVR4 represents a novel binding site on the folding scaffold shared between the inverte. *J.*  
523 *Biol. Chem.* 279:16786–96
- 524 Cao, Y., Liang, Y., Tanaka, K., Nguyen, C. T., Jedrzejczak, R. P., Joachimiak, A., and Stacey, G. 2014. The

- 525 kinase LYK5 is a major chitin receptor in Arabidopsis and forms a chitin-induced complex with  
526 related kinase CERK1. *Elife*. 3
- 527 Cregeen, S., Radišek, S., Mandelc, S., Turk, B., Štajner, N., Jakše, J., and Javornik, B. 2015. Different Gene  
528 Expressions of Resistant and Susceptible Hop Cultivars in Response to Infection with a Highly  
529 Aggressive Strain of *Verticillium albo-atrum*. *Plant Mol. Biol. Rep.* 33:689–704
- 530 Dawson, N. L., Sillitoe, I., Lees, J. G., Lam, S. D., and Orengo, C. A. 2017. CATH-Gene3D: Generation of the  
531 resource and its use in obtaining structural and functional annotations for protein sequences. Pages  
532 79–110 in: *Methods in Molecular Biology*,
- 533 Dodds, P. N., and Rathjen, J. P. 2010. Plant immunity: towards an integrated view of plant-pathogen  
534 interactions. *Nat. Rev. Genet.* 11:539–48
- 535 Dou, D., and Zhou, J.-M. 2012. Phytopathogen Effectors Subverting Host Immunity: Different Foes,  
536 Similar Battleground. *Cell Host Microbe*. 12:484–495
- 537 Duan, Y., Wu, C., Chowdhury, S., Lee, M. C., Xiong, G., Zhang, W., Yang, R., Cieplak, P., Luo, R., Lee, T.,  
538 Caldwell, J., Wang, J., and Kollman, P. 2003. A point-charge force field for molecular mechanics  
539 simulations of proteins based on condensed-phase quantum mechanical calculations. *J. Comput.*  
540 *Chem.* 24:1999–2012
- 541 van Esse, H. P., Bolton, M. D., Stergiopoulos, I., de Wit, P. J. G. M., and Thomma, B. P. H. J. 2007. The  
542 chitin-binding *Cladosporium fulvum* effector protein Avr4 is a virulence factor. *Mol. Plant. Microbe*.  
543 *Interact.* 20:1092–101
- 544 Finn, R. D., Bateman, A., Clements, J., Coggill, P., Eberhardt, R. Y., Eddy, S. R., Heger, A., Hetherington, K.,  
545 Holm, L., Mistry, J., Sonnhammer, E. L. L., Tate, J., and Punta, M. 2014. Pfam: The protein families  
546 database. *Nucleic Acids Res.* 42:222–230
- 547 Flajšman, M., Mandelc, S., Radišek, S., and Javornik, B. 2017a. Xylem sap extraction method from hop  
548 plants. *Bio-Protocol*. 7:1–11
- 549 Flajšman, M., Mandelc, S., Radišek, S., Štajner, N., Jakše, J., Košmelj, K., and Javornik, B. 2016.  
550 Identification of Novel Virulence-Associated Proteins Secreted to Xylem by *Verticillium nonalfalfae*  
551 During Colonization of Hop Plants. *Mol. Plant-Microbe Interact.* 29:362–373
- 552 Flajšman, M., Radišek, S., and Javornik, B. 2017b. Pathogenicity Assay of *Verticillium nonalfalfae* on Hop  
553 Plants. *Bio-protocol*. 7:e2171
- 554 Gubaeva, E., Gubaev, A., Melcher, R., Cord-Landwehr, S., Singh, R., El Gueddari, N. E., and  
555 Moerschbacher, B. M. 2018. ‘Slipped sandwich’ model for chitin and chitosan perception in  
556 Arabidopsis. *Mol. Plant-Microbe Interact.* :MPMI-04-18-0098-R
- 557 Guillén, D., Sánchez, S., and Rodríguez-Sanoja, R. 2010. Carbohydrate-binding domains: multiplicity of  
558 biological roles. *Appl. Microbiol. Biotechnol.* 85:1241–1249
- 559 Gust, A. A., Willmann, R., Desaki, Y., Grabherr, H. M., and Nürnberger, T. 2012. Plant LysM proteins:  
560 modules mediating symbiosis and immunity. *Trends Plant Sci.* 17:495–502
- 561 Hayafune, M., Berisio, R., Marchetti, R., Silipo, A., Kayama, M., Desaki, Y., Arima, S., Squeglia, F.,  
562 Ruggiero, A., Tokuyasu, K., Molinaro, A., Kaku, H., and Shibuya, N. 2014. Chitin-induced activation of

- 563 immune signaling by the rice receptor CEBiP relies on a unique sandwich-type dimerization. Proc.  
564 Natl. Acad. Sci. U. S. A. 111:E404-13
- 565 Hurlburt, N. K., Chen, L.-H., Stergiopoulos, I., and Fisher, A. J. 2018. Structure of the *Cladosporium fulvum*  
566 Avr4 effector in complex with (GlcNAc)<sub>6</sub> reveals the ligand-binding mechanism and uncouples its  
567 intrinsic function from recognition by the Cf-4 resistance protein Y. Wang, ed. PLOS Pathog.  
568 14:e1007263
- 569 Jakše, J., Čerenak, A., Radišek, S., Satovic, Z., Luthar, Z., and Javornik, B. 2013. Identification of  
570 quantitative trait loci for resistance to *Verticillium* wilt and yield parameters in hop (*Humulus*  
571 *lupulus* L.). Theor Appl Genet.
- 572 Jakše, J., Jelen, V., Radišek, S., de Jonge, R., Mandelc, S., Majer, A., Curk, T., Zupan, B., Thomma, B. P. H.  
573 J., and Javornik, B. 2018. Genome sequence of xylem-invading *Verticillium nonalfalfae* lethal strain.  
574 Genome Announc. 6:e01458-17
- 575 Jiménez-Barbero, J., Javier Cañada, F., Asensio, J. L., Aboitiz, N., Vidal, P., Canales, A., Groves, P., Gabius,  
576 H.-J., and Siebert, H.-C. 2006. Hevein Domains: An Attractive Model to Study Carbohydrate-Protein  
577 Interactions at Atomic Resolution. Adv. Carbohydr. Chem. Biochem. 60:303–354
- 578 Jones, J. D. G., and Dangl, J. L. 2006. The plant immune system. Nature. 444:323–9
- 579 de Jonge, R., Peter van Esse, H., Kombrink, A., Shinya, T., Desaki, Y., Bours, R., van der Krol, S., Shibuya,  
580 N., Joosten, M. H. A. J., and Thomma, B. P. H. J. 2010. Conserved Fungal LysM Effector Ecp6  
581 Prevents Chitin-Triggered Immunity in Plants. Science (80-. ). 329:953–955
- 582 Kastiris, P. L., and Bonvin, A. M. J. J. 2013. On the binding affinity of macromolecular interactions: daring  
583 to ask why proteins interact. J. R. Soc. Interface. 10:20120835
- 584 Kombrink, A., Rovenich, H., Shi-Kunne, X., Rojas-Padilla, E., van den Berg, G. C. M., Domazakis, E., de  
585 Jonge, R., Valkenburg, D. J., Sánchez-Vallet, A., Seidl, M. F., and Thomma, B. P. H. J. 2017.  
586 *Verticillium dahliae* LysM effectors differentially contribute to virulence on plant hosts. Mol. Plant  
587 Pathol. 18:596–608
- 588 Krieger, E., and Vriend, G. 2015. New ways to boost molecular dynamics simulations. J. Comput. Chem.  
589 36:996–1007
- 590 Krieger, E., and Vriend, G. 2014. YASARA View - molecular graphics for all devices - from smartphones to  
591 workstations. Bioinformatics. 30:2981–2
- 592 Lerner, D. R., and Raikhel, N. V. 1992. The gene for stinging nettle lectin (*Urtica dioica* agglutinin)  
593 encodes both a lectin and a chitinase. J. Biol. Chem. 267:11085–91
- 594 Li, W., Cowley, A., Uludag, M., Gur, T., McWilliam, H., Squizzato, S., Park, Y. M., Buso, N., and Lopez, R.  
595 2015. The EMBL-EBI bioinformatics web and programmatic tools framework. Nucleic Acids Res.  
596 43:W580-4
- 597 Liu, P., and Stajich, J. E. 2015. Characterization of the Carbohydrate Binding Module 18 gene family in the  
598 amphibian pathogen *Batrachochytrium dendrobatidis*. Fungal Genet. Biol. 77:31–39
- 599 Liu, S., Wang, J., Han, Z., Gong, X., Zhang, H., and Chai, J. 2016. Molecular Mechanism for Fungal Cell Wall  
600 Recognition by Rice Chitin Receptor OsCEBiP. Structure. 24:1192–1200



- 601 Liu, T., Liu, Z., Song, C., Hu, Y., Han, Z., She, J., Fan, F., Wang, J., Jin, C., Chang, J., Zhou, J.-M., and Chai, J.  
602 2012. Chitin-induced dimerization activates a plant immune receptor. *Science*. 336:1160–4
- 603 Liu, W., Xie, Y., Ma, J., Luo, X., Nie, P., Zuo, Z., Lahrmann, U., Zhao, Q., Zheng, Y., Zhao, Y., Xue, Y., and  
604 Ren, J. 2015. IBS: An illustrator for the presentation and visualization of biological sequences.  
605 *Bioinformatics*. 31:3359–3361
- 606 Lombard, V., Golaconda Ramulu, H., Drula, E., Coutinho, P. M., and Henrissat, B. 2014. The carbohydrate-  
607 active enzymes database (CAZy) in 2013. *Nucleic Acids Res.* 42:D490-5
- 608 Macho, A. P., and Zipfel, C. 2014. Plant PRRs and the activation of innate immune signaling. *Mol. Cell*.  
609 54:263–72
- 610 Mandelc, S., and Javornik, B. 2015. The secretome of vascular wilt pathogen *Verticillium albo-atrum* in  
611 simulated xylem fluid. *Proteomics*. 15:787–797
- 612 Marshall, R., Kombrink, A., Motteram, J., Loza-Reyes, E., Lucas, J., Hammond-Kosack, K. E., Thomma, B. P.  
613 H. J., and Rudd, J. J. 2011. Analysis of two in planta expressed LysM effector homologs from the  
614 fungus *Mycosphaerella graminicola* reveals novel functional properties and varying contributions to  
615 virulence on wheat. *Plant Physiol.* 156:756–69
- 616 Marton, K., Flajšman, M., Radišek, S., Košmelj, K., Jakše, J., Javornik, B., and Berne, S. 2018.  
617 Comprehensive analysis of *Verticillium nonalfalfae* in silico secretome uncovers putative effector  
618 proteins expressed during hop invasion Z. Zhang, ed. *PLoS One*. 13:e0198971
- 619 Mentlak, T. a., Kombrink, A., Shinya, T., Ryder, L. S., Otomo, I., Saitoh, H., Terauchi, R., Nishizawa, Y.,  
620 Shibuya, N., Thomma, B. P. H. J., and Talbot, N. J. 2012. Effector-Mediated Suppression of Chitin-  
621 Triggered Immunity by *Magnaporthe oryzae* Is Necessary for Rice Blast Disease. *Plant Cell*. 24:322–  
622 335
- 623 Miya, A., Albert, P., Shinya, T., Desaki, Y., Ichimura, K., Shirasu, K., Narusaka, Y., Kawakami, N., Kaku, H.,  
624 and Shibuya, N. 2007. CERK1, a LysM receptor kinase, is essential for chitin elicitor signaling in  
625 *Arabidopsis*. *Proc. Natl. Acad. Sci. U. S. A.* 104:19613–8
- 626 Mochizuki, S., Saitoh, K. ichiro, Minami, E., and Nishizawa, Y. 2011. Localization of probe-accessible chitin  
627 and characterization of genes encoding chitin-binding domains during rice-*Magnaporthe oryzae*  
628 interactions. *J. Gen. Plant Pathol.* 77:163–173
- 629 Möller, E. M. M., Bahnweg, G., Sandermann, H., and Geiger, H. H. H. 1992. A simple and efficient  
630 protocol for isolation of high molecular weight DNA from filamentous fungi, fruit bodies, and  
631 infected plant tissues. *Nucleic Acids Res.* 20:6115–6
- 632 Progar, V., Jakše, J., Štajner, N., Radišek, S., Javornik, B., and Berne, S. 2017. Comparative transcriptional  
633 analysis of hop responses to infection with *Verticillium nonalfalfae*. *Plant Cell Rep.* 36:1599–1613
- 634 Qi, X., Sun, Y., and Xiong, S. 2015. A single freeze-thawing cycle for highly efficient solubilization of  
635 inclusion body proteins and its refolding into bioactive form. *Microb. Cell Fact.* 14
- 636 R Core Team. 2016. R: A Language and Environment for Statistical Computing.
- 637 Radišek, S., Jakše, J., and Javornik, B. 2004. Development of pathotype-specific SCAR markers for  
638 detection of *Verticillium albo-atrum* isolates from hop. *Plant Dis.* 88:1115–1122

- 639 Radišek, S., Jakše, J., and Javornik, B. 2006. Genetic variability and virulence among *Verticillium albo-*  
640 *atrum* isolates from hop. *Eur. J. plant Pathol.* 116:301–314
- 641 Radišek, S., Jakše, J., Simončič, A., and Javornik, B. 2003. Characterization of *Verticillium albo-atrum* Field  
642 Isolates Using Pathogenicity Data and AFLP Analysis. *Plant Dis.* 87:633–638
- 643 Ranf, S. 2017. Sensing of molecular patterns through cell surface immune receptors. *Curr. Opin. Plant*  
644 *Biol.* 38:68–77
- 645 Sanchez-Vallet, A., Mesters, J. R., and Thomma, B. P. H. J. 2014. The battle for chitin recognition in plant-  
646 microbe interactions. *FEMS Microbiol. Rev.* 39:171–83
- 647 Sánchez-Vallet, A., Saleem-Batcha, R., Kombrink, A., Hansen, G., Valkenburg, D.-J., Thomma, B. P. H. J.,  
648 and Mesters, J. R. 2013. Fungal effector Ecp6 outcompetes host immune receptor for chitin binding  
649 through intrachain LysM dimerization. *Elife.* 2:e00790
- 650 Schmittgen, T. D., and Livak, K. J. 2008. Analyzing real-time PCR data by the comparative C(T) method.  
651 *Nat. Protoc.* 3:1101–8
- 652 Seidl, M. F., Faino, L., Shi-Kunne, X., van den Berg, G. C. M., Bolton, M. D., and Thomma, B. P. H. J. 2015.  
653 The Genome of the Saprophytic Fungus *Verticillium tricorpus* Reveals a Complex Effector Repertoire  
654 Resembling That of Its Pathogenic Relatives. *Mol. Plant-Microbe Interact.* 28:362–373
- 655 Shibuya, N., and Minami, E. 2001. Oligosaccharide signalling for defence responses in plant. *Physiol. Mol.*  
656 *Plant Pathol.* 59:223–233
- 657 Shinya, T., Nakagawa, T., Kaku, H., and Shibuya, N. 2015. Chitin-mediated plant–fungal interactions:  
658 catching, hiding and handshaking. *Curr. Opin. Plant Biol.* 26:64–71
- 659 Soanes, D. M., Alam, I., Cornell, M., Wong, H. M., Hedeler, C., Paton, N. W., Rattray, M., Hubbard, S. J.,  
660 Oliver, S. G., and Talbot, N. J. 2008. Comparative genome analysis of filamentous fungi reveals gene  
661 family expansions associated with fungal pathogenesis. *PLoS One.* 3:e2300
- 662 Sperschneider, J., Dodds, P. N., Singh, K. B., and Taylor, J. M. 2017. ApoplastP: prediction of effectors and  
663 plant proteins in the apoplast using machine learning. [doi.org. :182428](https://doi.org/10.1101/182428)
- 664 Spoel, S. H., and Dong, X. 2012. How do plants achieve immunity? Defence without specialized immune  
665 cells. *Nat. Rev. Immunol.* 12:89–100
- 666 Stergiopoulos, I., van den Burg, H. A., Okmen, B., Beenen, H. G., van Liere, S., Kema, G. H. J., and de Wit,  
667 P. J. G. M. 2010. Tomato Cf resistance proteins mediate recognition of cognate homologous  
668 effectors from fungi pathogenic on dicots and monocots. *Proc. Natl. Acad. Sci.* 107:7610–5
- 669 Stergiopoulos, I., De Kock, M. J. D., Lindhout, P., and De Wit, P. J. G. M. 2007. Allelic variation in the  
670 effector genes of the tomato pathogen *Cladosporium fulvum* reveals different modes of adaptive  
671 evolution. *Mol. Plant. Microbe. Interact.* 20:1271–1283
- 672 Takahara, H., Hacquard, S., Kombrink, A., Hughes, H. B., Halder, V., Robin, G. P., Hiruma, K., Neumann, U.,  
673 Shinya, T., Kombrink, E., Shibuya, N., Thomma, B. P. H. J., and O’Connell, R. J. 2016. *Colletotrichum*  
674 *higginsianum* extracellular LysM proteins play dual roles in appressorial function and suppression of  
675 chitin-triggered plant immunity. *New Phytol.* 211:1323–1337

676 Trott, O., and Olson, A. J. 2009. AutoDock Vina: Improving the speed and accuracy of docking with a new  
677 scoring function, efficient optimization, and multithreading. *J. Comput. Chem.* 31:NA-NA

678 Waterhouse, A., Bertoni, M., Bienert, S., Studer, G., Tauriello, G., Gumienny, R., Heer, F. T., de Beer, T. A.  
679 P., Rempfer, C., Bordoli, L., Lepore, R., and Schwede, T. 2018. SWISS-MODEL: homology modelling  
680 of protein structures and complexes. *Nucleic Acids Res.* 46:W296–W303

681 Wright, H. T., Sandrasegaram, G., and Wright, C. S. 1991. Evolution of a family of N-acetylglucosamine  
682 binding proteins containing the disulfide-rich domain of wheat germ agglutinin. *J. Mol. Evol.*  
683 33:283–94

684

685

686 **Tables**

687 **Table 1.** The results of homology modelling of the VnaChtBP using the SWISS-MODEL server.

|         | Template | Description            | Seq Identity | Oligo-States | GMOE | QMEAN | Coverage |
|---------|----------|------------------------|--------------|--------------|------|-------|----------|
| Model01 | 2uwg.1.A | Wheat germ lectin      | 43.98%       | Homo-dimer   | 0.31 | -4.61 | 98-318   |
| Model02 | 2wgc.1.A | Agglutinin isolectin 1 | 40.96%       | Homo-dimer   | 0.32 | -3.22 | 39-254   |
| Model03 | 1ulk.1.A | Lectin-C               | 49.15%       | Homo-dimer   | 0.20 | -0.65 | 212-378  |

688 **Table 2.** Comparison of chitin oligomer binding affinities of various fungal effectors and plant defense  
689 proteins, obtained using ITC or SPR.

| Organism                           | Protein  | CAZy  | Ligand                      | K <sub>d</sub> (μM)    | Method | Reference                  |
|------------------------------------|----------|-------|-----------------------------|------------------------|--------|----------------------------|
| <i>Verticillium nonalfalfae</i>    | VnaChtBP | CBM18 | (GlcNAc) <sub>6</sub>       | 0.78 ± 0.58            | SPR    | This study                 |
| <i>Cladosporium fulvum</i>         | Avr4     | CBM14 | (GlcNAc) <sub>6</sub>       | 6.3 ± 0.23             | ITC    | (van den Burg et al. 2004) |
| <i>Cladosporium fulvum</i>         | Ecp6     | CBM50 | (GlcNAc) <sub>4,5,6,8</sub> | 11.5 to 3.7            | ITC    | (de Jonge et al. 2010)     |
| <i>Cladosporium fulvum</i>         | Ecp6     | CBM50 | (GlcNAc) <sub>8</sub>       | 1.3 × 10 <sup>-3</sup> | SPR    | (Mentlak et al. 2012)      |
| <i>Magnaporthe oryzae</i>          | Slp1     | CBM50 | (GlcNAc) <sub>8</sub>       | 2.4 × 10 <sup>-3</sup> | SPR    | (Mentlak et al. 2012)      |
| <i>Colletotrichum higginsianum</i> | ChELP1   | CBM50 | (GlcNAc) <sub>8</sub> -Bio  | 2.6 × 10 <sup>-5</sup> | SPR    | (Takahara et al. 2016)     |
| <i>Colletotrichum higginsianum</i> | ChELP2   | CBM50 | (GlcNAc) <sub>8</sub> -Bio  | 2.5 × 10 <sup>-4</sup> | SPR    | (Takahara et al. 2016)     |
| <i>Arabidopsis thaliana</i>        | AtLYK5   | CBM50 | (GlcNAc) <sub>8</sub>       | 1.72                   | ITC    | (Cao et al. 2014)          |
| <i>Arabidopsis thaliana</i>        | AtCERK1  | CBM50 | (GlcNAc) <sub>8</sub>       | 455                    | ITC    | (Cao et al. 2014)          |
| <i>Arabidopsis thaliana</i>        | AtCERK1  | CBM50 | (GlcNAc) <sub>8</sub>       | 448                    | ITC    | (Liu et al. 2012)          |
| <i>Hevea brasiliensis</i>          | Hevein   | CBM18 | (GlcNAc) <sub>5</sub>       | 2.1                    | ITC    | (Asensio et al. 2000)      |

690 ITC, isothermal titration calorimetry; SPR, surface plasmon resonance, CBM, carbohydrate-binding module; GlcNAc,  
691 N-Acetylglucosamin, Bio, biotinylated

692 **Table 3.** List of primers used for cloning, gene disruption and expression of *VnaChtBP*, and fungal  
693 identification.

| PRIMER     | SEQ 5' – 3'                    | NOTE                                                  |
|------------|--------------------------------|-------------------------------------------------------|
| CBP_F      | ATGCGTTTCTCCGCCGTTCTTA         | Cloning of <i>VnaChtBP</i>                            |
| CBP_R      | TTAGGTGCAGATACCAAAGGCACGCT     | Cloning of <i>VnaChtBP</i>                            |
| Vna8.213-F | GCCAAGCCCCCAAGA                | <i>VnaChtBP 3</i> gene expression with RT-qPCR        |
| Vna8.213-R | AAGAGGCGTCTCGGAAAA             | <i>VnaChtBP</i> gene expression with RT-qPCR          |
| T7p        | TAATACGACTCACTATAGGG           | Vector primer for DNA sequencing                      |
| SP6        | ATTTAGGTGACACTATAG             | Vector primer for DNA sequencing                      |
| CBD_O1for  | GGTCTTAAUTGGAACCTCTTCGCAATCC   | Preparation of <i>VnaChtBP</i> KO mutants             |
| CBD_O2rev  | GGCATTAAUGAGTGTGTCGACTAGGCTTGG | Preparation of <i>VnaChtBP</i> KO mutants             |
| CBD_A3for  | GGACTTAAUCGGCTGTGTTACATCAGTT   | Preparation of <i>VnaChtBP</i> KO mutants             |
| CBD_A4rev  | GGGTTTAAUGTCGTTCTTCACCTCGAAT   | Preparation of <i>VnaChtBP</i> KO mutants             |
| 9-1gs-F    | GGTAACGTCATCGAACGACATC         | <i>V. nonalfalfae</i> detection (Radišek et al. 2004) |
| 9-1gs-R    | CACACGCTACATATCAAACAGCATAT     | <i>V. nonalfalfae</i> detection (Radišek et al. 2004) |

694

## 695 **Figure captions**

696 **Fig. 1.** Domain architecture (A-D) and gene expression (E) of CBM18-containing proteins identified in  
697 *Verticillium nonalfalfae*. Protein organization was determined by querying protein sequences against  
698 CATH-Gene3D (Dawson et al. 2017) using the FunFHMmer web server and presented by IBS software  
699 (Liu et al. 2015). Proteins were classified into four groups: Lectin-like proteins (A), Chitinases (B), Chitin  
700 deacetylases (C) and Xyloglucan endotransglucosylase (D). Gene expression is presented as a heatmap of  
701  $\log_2$ CPM values determined by RNA sequencing of infected hop (Progar et al. 2017).

702 **Fig. 2.** *VnaChtBP*, a gene encoding the CBM18 chitin binding protein of *Verticillium nonalfalfae*, is highly  
703 expressed in stems of susceptible hop at the late stages of infection. The gene expression of *VnaChtBP*  
704 was quantified by RT-qPCR using a cDNA prepared from the roots and shoots of infected susceptible  
705 ('Celeia') and resistant ('Wye Target') hop plants (n = 5) at 6, 12 and 18 dpi and the expression levels  
706 were normalised relative to the expression of the gene in ½ liquid Czapek-Dox medium using  
707 topoisomerase (*VnaUn.148*) and splicing factor 3a2 (*Vna8.801*) as housekeeping genes (Marton et al.  
708 2018). FC, fold change; dpi, days post inoculation.

709 **Fig. 3.** Confirmation of *VnaChtBP* dimerization (A) and schematic representation of the *VnaChtBP*  
710 homology model in complex with chitin hexamer (B). A: The effector gene *VnaChtBP* was cloned into the  
711 vectors pDEST22 and pDEST32 to serve both as bait and as prey and yeast-two-hybrid assay was  
712 performed. Weak dimerization of the effector was confirmed on a triple dropout reporter media SC-LWH  
713 and no self-activation of the pDEST22 construct with empty pDEST32 vector was detected on the X-gal  
714 reporter. B: The 3D model of *VnaChtBP* obtained by Swiss-Model (Arnold et al. 2006; Waterhouse et al.  
715 2018) was refined by YASARA Structure (Krieger and Vriend 2014, 2015) and used in YASARA's AutoDock  
716 VINA module (Trott and Olson 2009) for molecular docking of chitin hexamer, built in the SWEET  
717 PROGRAM (Bohne et al. 1998, 1999). *VnaChtBP* is in dimeric form, the chitin binding domains of the  
718 Chain A (Chain B) are in cyan (grey) color shades. The chitin hexamer is shown in stick representation.

719 **Fig. 4.** A carbohydrate sedimentation test confirmed that the recombinant protein *VnaChtBP* specifically  
720 binds to chitin. A recombinant protein (15 µg) that bound to chitin beads and crab shell chitin was  
721 detected in the sediment, while it was present in the supernatant when incubated with cellulose, xylan  
722 or without the addition of carbohydrates (control). Western blot analysis was performed with primary  
723 antibody His-probe (H-3) (SCBT) (1:1,000) and secondary Chicken anti-mouse IgG-HRP (SCBT) (1:5,000).  
724 Protein bands were detected using Super Signal West Pico (ThermoFisher Scientific) ECL substrate in a  
725 GelDoc-It2 Imager (UVP).

726 **Fig. 5.** SPR analysis of chitin hexamer binding to *VnaChtBP*. Different concentrations (0.05, 0.1, 0.2, 0.4,  
727 0.8, 1.6, 3.2 and 6.4 µM) of (GlcNAc)<sub>6</sub> were tested for the binding (top panel). The binding curve (bottom  
728 panel) was generated by fitting steady state response levels at the end of the association phase, versus  
729 the concentration of the injected chitin hexamer. K<sub>d</sub> was obtained by fitting the data to the steady-state  
730 affinity model. For reproducibility of binding, three independent titration experiments were performed.  
731 (GlcNAc)<sub>6</sub>, hexa-N-acetyl chitohexaose

732 **Fig 6.** VnaChtBP protects fungus against degradation by plant chitinases. Micrographs of *Trihoderma*  
733 *viride* germinating spores, preincubated at RT for 2 h with 3  $\mu$ M VnaChtBP, followed by the addition of  
734 xylem sap (19 U of chitinase/mg total protein) from *V. nonalfalfae* infected hop, were taken 24 h after  
735 treatment. The recombinant protein VnaChtBP caused aggregation and compaction of *T. viride* hyphae  
736 and protected the fungus from degradation by xylem sap chitinases. The chitinase activity of xylem sap  
737 was measured as a release of dye from Chitin Azure and one chitinase unit was defined as the amount of  
738 enzyme that caused a 0.01 increase in absorbance at 575 nm, measured at pH 5.0 and 25°C.

739 **Fig. 7.** Symptom development in susceptible hop following infection with the wild type *V. nonalfalfae*  
740 and two knockout mutants of *VnaChtBP*. Plants of susceptible hop 'Celeia' were inoculated by root  
741 dipping in  $5 \times 10^6$  conidia/ml suspension and Verticillium wilting symptoms were assessed five times post  
742 inoculation. A: Both *VnaChtBP* deletion mutants displayed Verticillium wilting symptoms (chlorosis and  
743 necrosis of the leaves) in susceptible hop similar to the wild type fungus. Pictures were taken 35 days  
744 post inoculation. B: According to disease severity index (DSI) assessment with a 0-5 scale (Radišek et al.  
745 2003) there were no significant differences between the wild type *V. nonalfalfae* and knockout mutants  
746 of *VnaChtBP*. Means with SE were calculated for 10 plants per treatment. Dpi, days post inoculation.

747

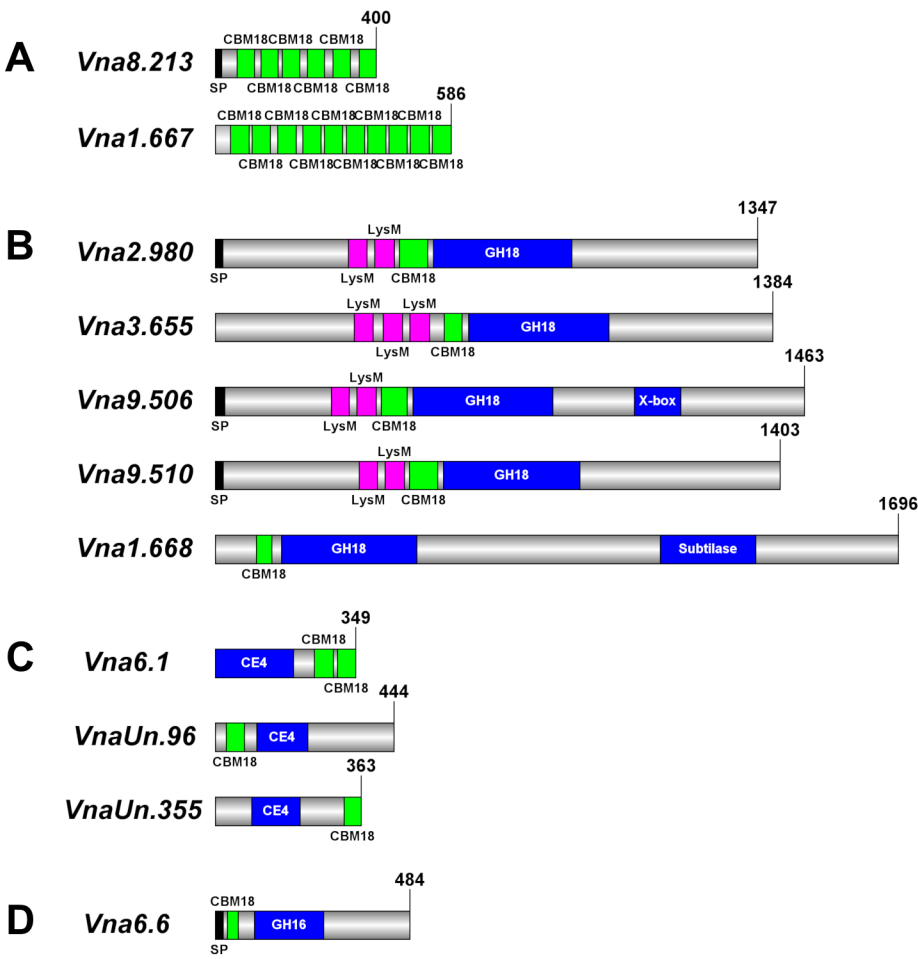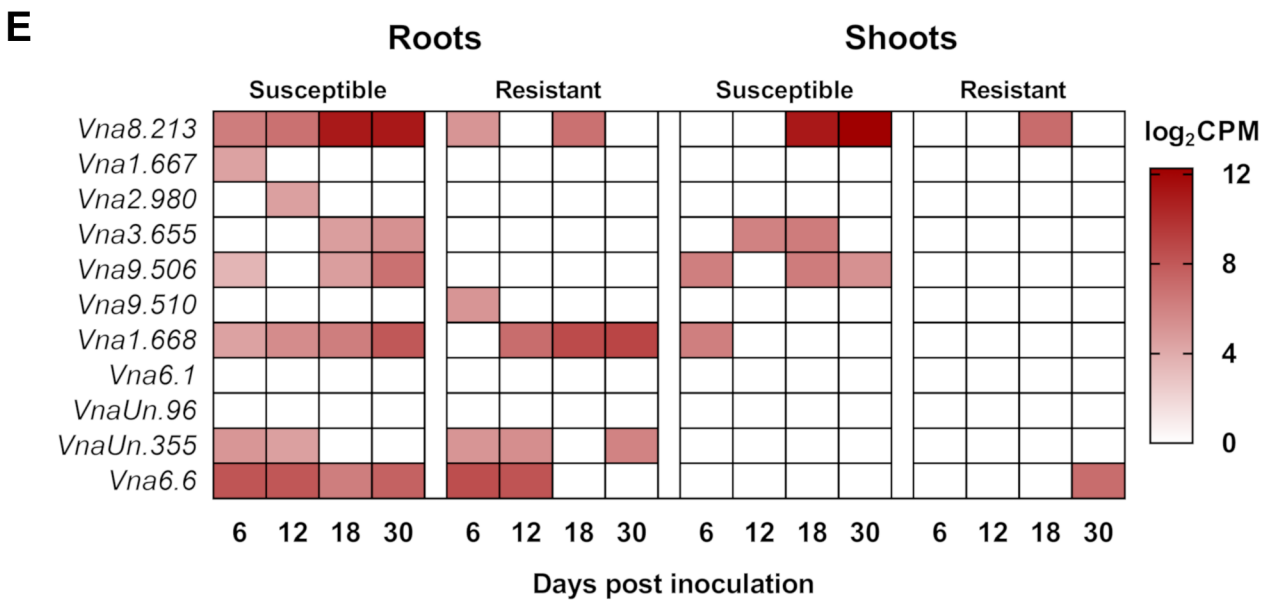

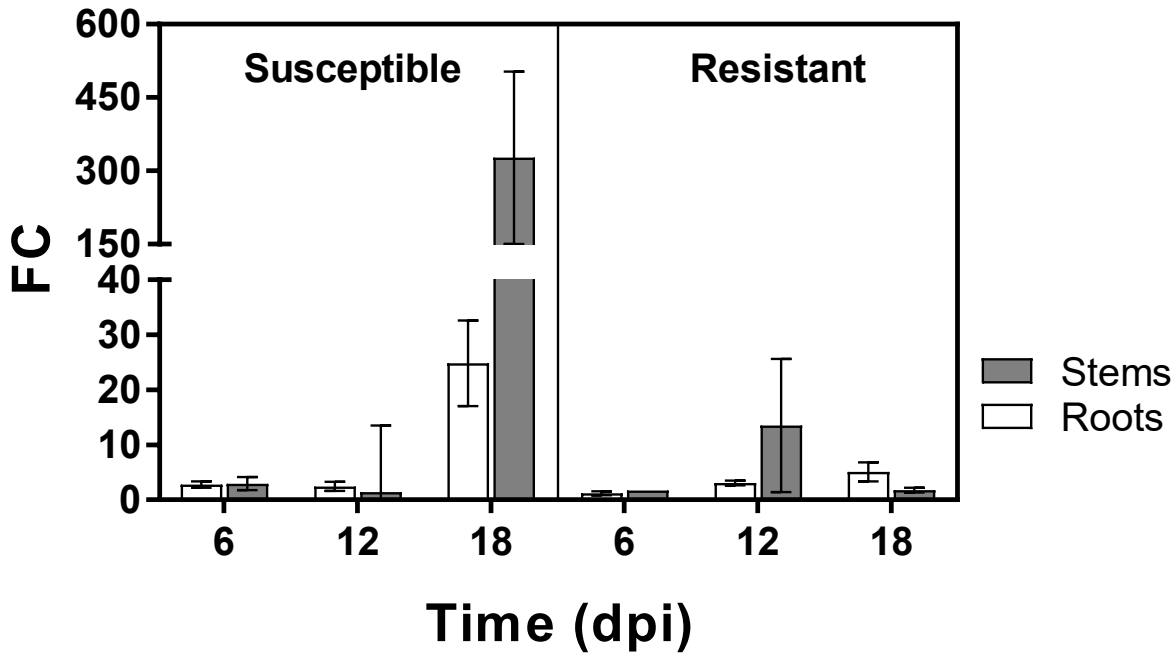



**A**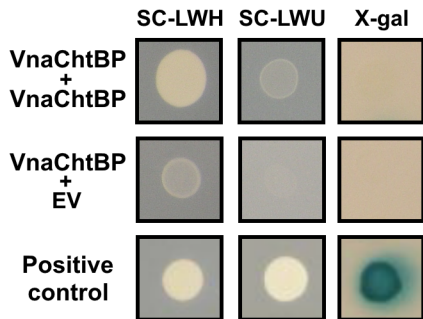**B**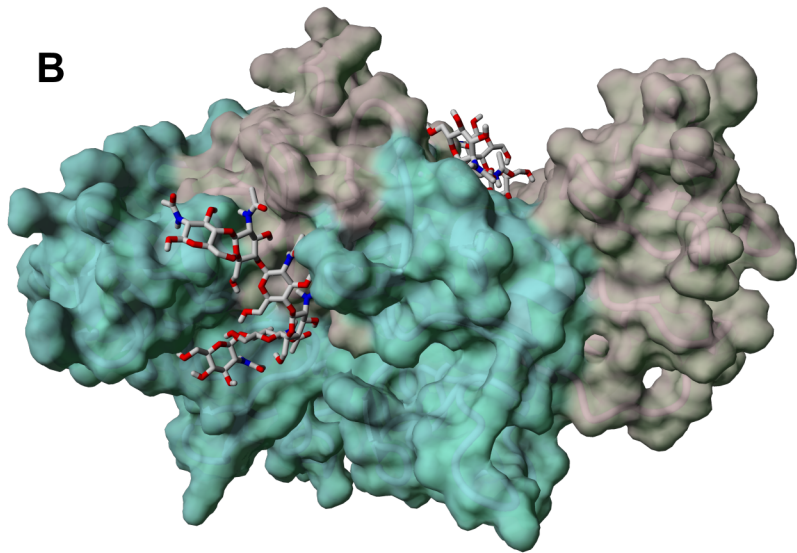

**Supernatant**

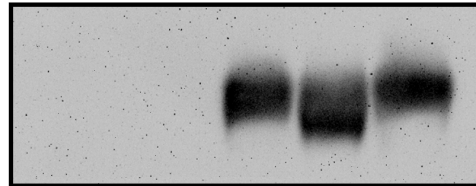

**Pellet**

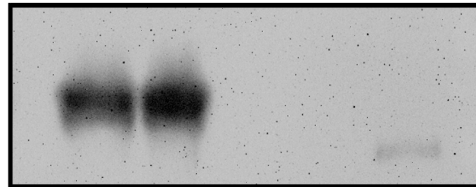

$\alpha$ -His-HRP

**A**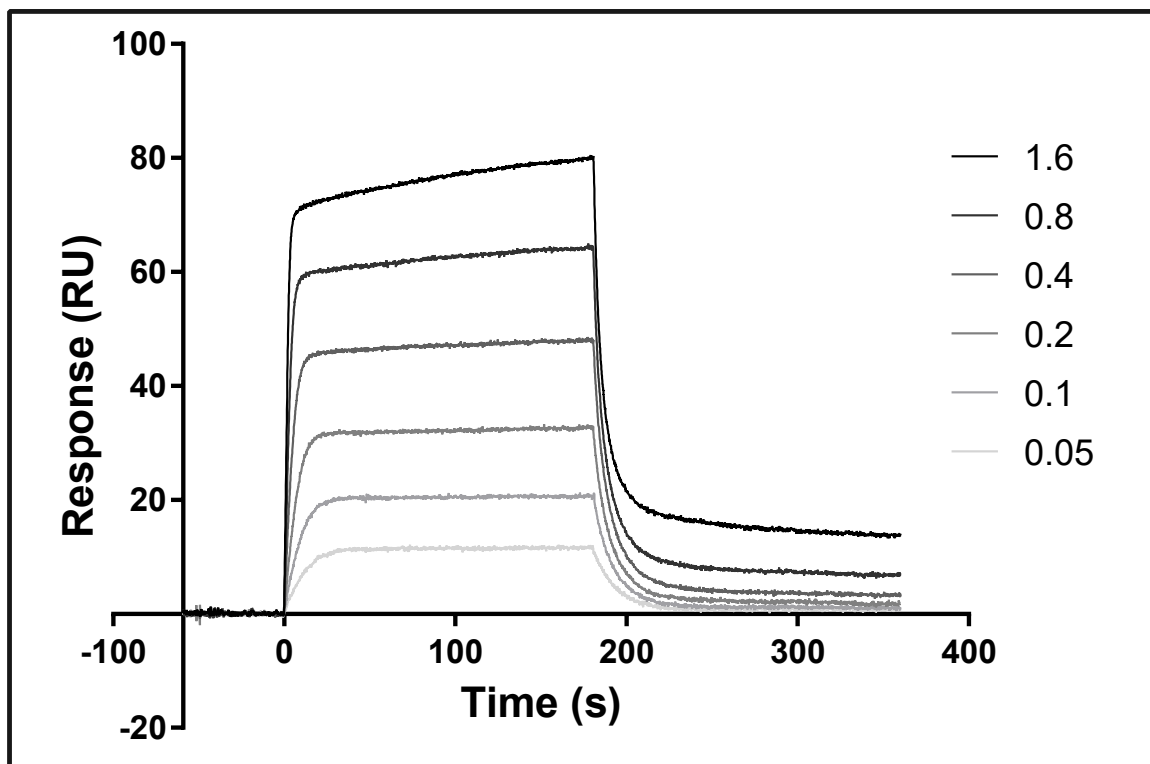**B**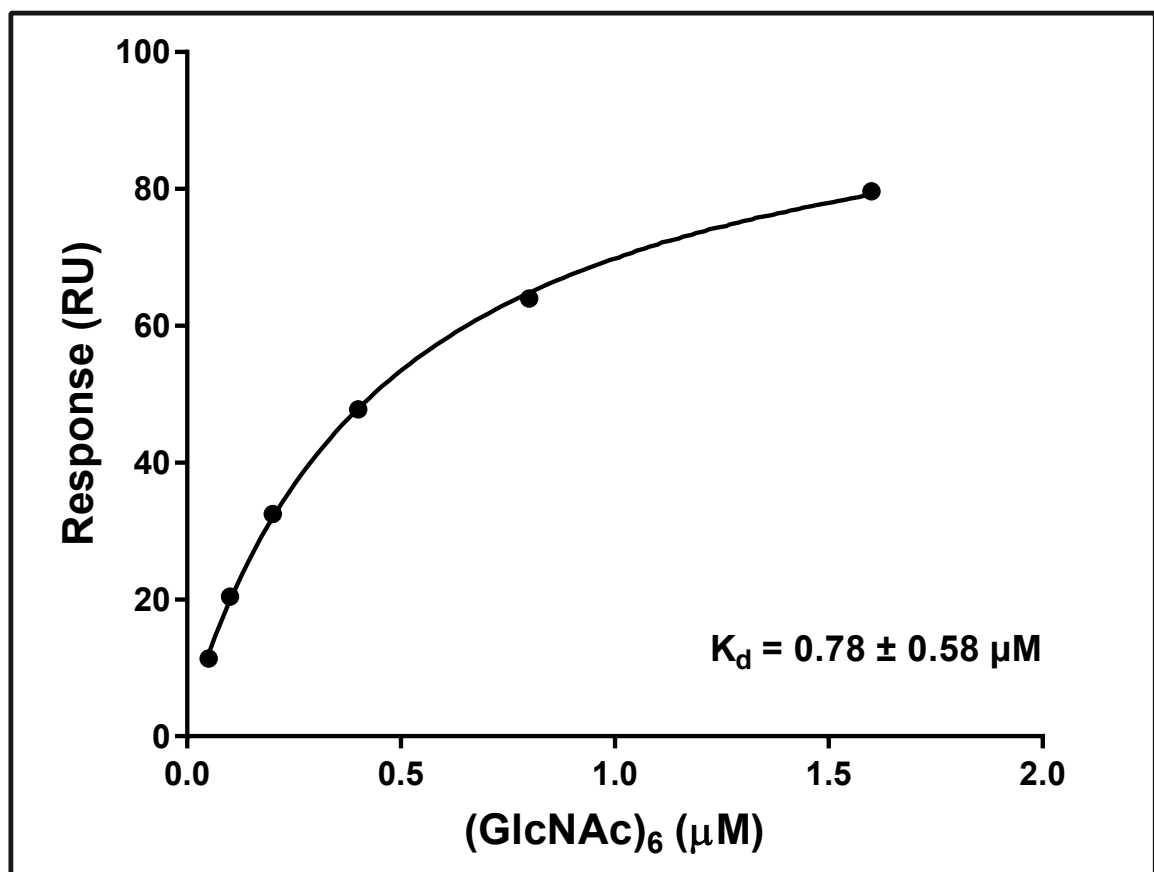

**+ Xylem sap**

**- Xylem sap**

**+ VnaChtBP**

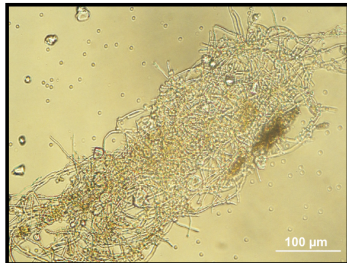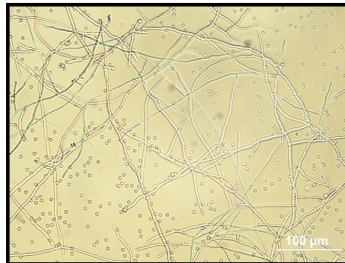

**- VnaChtBP**

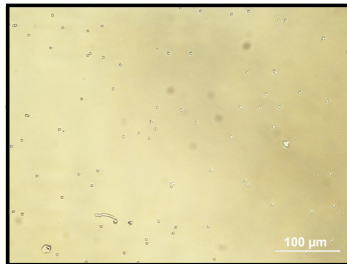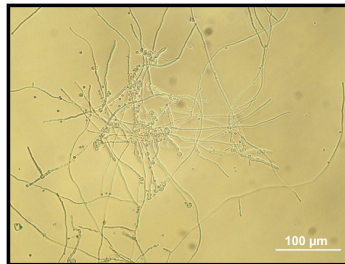

**A**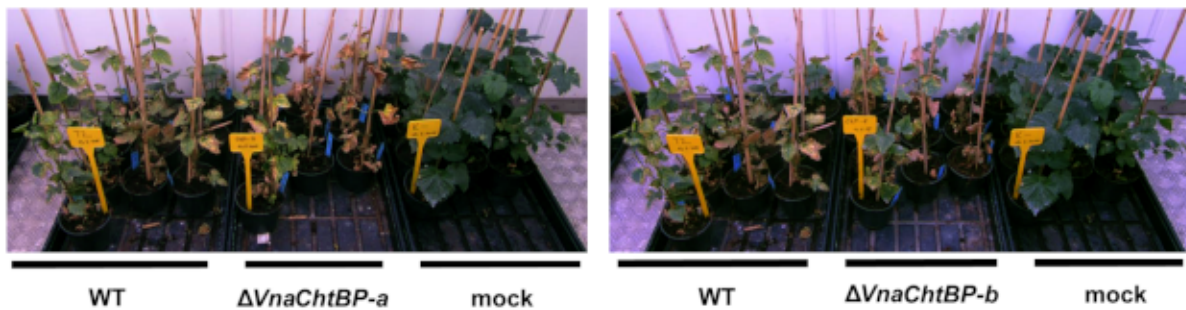**B**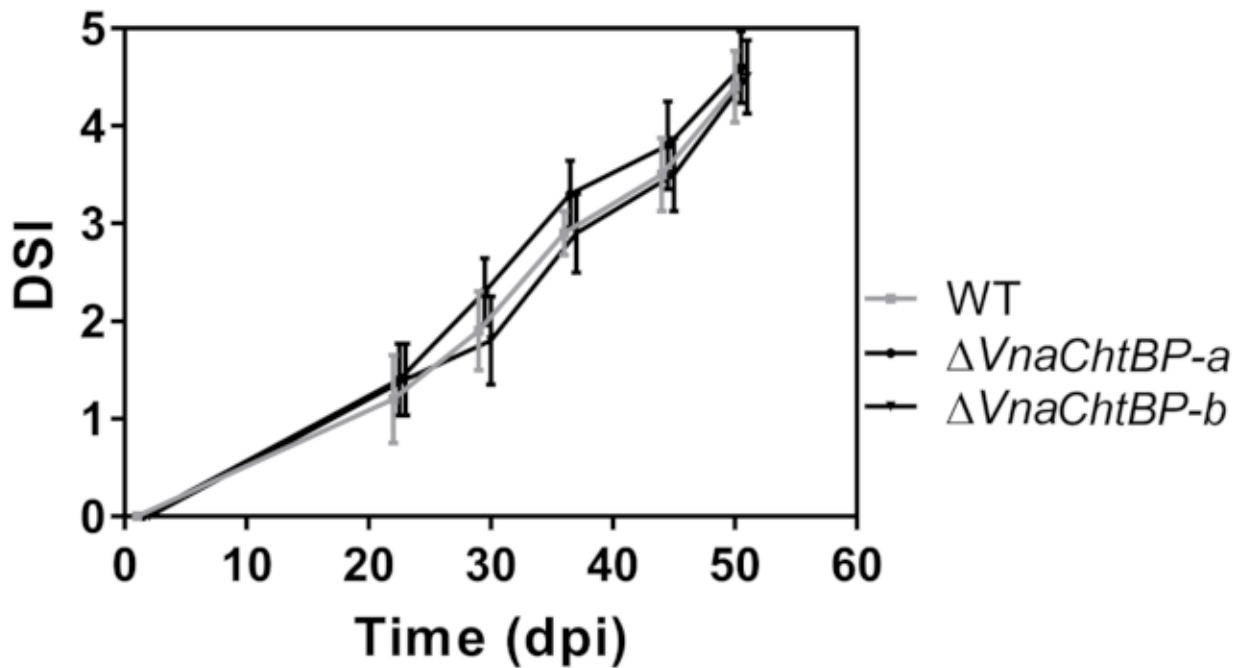

Source: https://www.biorxiv.org/content/10.1101/462499v1.full.pdf
